# Supplementary material for: Outcome in juvenile idiopathic arthritis: a population-based study from Sweden
Source: Springer Nature journal article supplement (doi:10.1186/s13075-019-1994-8), 2019-10-28
Supplement: MOESM2 [file 17319688]

Supplementary table 1

|                        |                                                        | Oligoarticular |            |                 |                   |            |            |             |            |             |
|------------------------|--------------------------------------------------------|----------------|------------|-----------------|-------------------|------------|------------|-------------|------------|-------------|
|                        |                                                        | Total (n 251)  | ERA (n 22) | Extended (n 28) | Persistent (n 84) | RF- (n 35) | RF+ (n 17) | JPsA (n 17) | sJIA (n 7) | uJIA (n 41) |
| <b>Glucocorticoids</b> | <b>No treatment</b>                                    | 109 (43.4)     | 6 (27.3)   | 13 (46.4)       | 49 (58.3)         | 11 (31.4)  | 4 (23.5)   | 7 (41.2)    | 5 (71.4)   | 14 (34.1)   |
|                        | <b>NSAID</b>                                           | 246 (98.0)     | 22 (100)   | 27 (96.4)       | 83 (98.8)         | 35 (100)   | 16 (94.1)  | 17 (100)    | 7 (100)    | 39 (95.1)   |
|                        | <b>Oral</b>                                            | 107 (42.6)     | 11 (50)    | 14 (50)         | 12 (14.3)         | 21 (60)    | 14 (82.4)  | 7 (41.2)    | 5 (71.4)   | 23 (56.1)   |
|                        | <b>Oral &lt; 2 months</b>                              | 65 (25.9)      | 8 (36.4)   | 12 (42.9)       | 11 (13.1)         | 14 (40)    | 8 (47.1)   | 2 (11.8)    |            | 10 (24.4)   |
|                        | <b>Intra-articular steroids</b>                        | 198 (78.9)     | 16 (72.7)  | 25 (89.3)       | 69 (82.1)         | 25 (71.4)  | 15 (88.2)  | 11 (64.7)   | 3 (42.9)   | 34 (82.9)   |
| <b>sDMARD</b>          | <b>Methotrexate</b>                                    | 152 (60.6)     | 15 (68.1)  | 23 (82.1)       | 27 (32.1)         | 32 (91.4)  | 17 (100)   | 11 (64.7)   | 2 (28.6)   | 25 (61.0)   |
|                        | <b>Salazopyrine</b>                                    | 25 (10.0)      | 4 (18.2)   | 3 (10.7)        | 1 (1.2)           | 3 (8.6)    | 1 (5.9)    | 1 (5.9)     |            | 12 (29.3)   |
|                        | <b>Azathioprine</b>                                    | 8 (3.2)        | 2 (9.1)    | 1 (3.6)         |                   | 1 (2.9)    | 1 (5.9)    |             |            | 3 (7.3)     |
|                        | <b>Antimalarial drugs</b>                              | 17 (6.8)       | 1 (4.5)    | 6 (21.4)        |                   | 2 (5.7)    | 2 (11.8)   | 1 (5.9)     |            | 5 (12.2)    |
| <b>bDMARD</b>          | <b>TNF<math>\alpha</math>-inhibitor</b>                | 60 (23.9)      | 7 (31.8)   | 11 (39.2)       | 3 (3.6)           | 13 (37.1)  | 12 (70.5)  | 2 (11.8)    | 1 (14.3)   | 11 (26.8)   |
|                        | <b>TNF<math>\alpha</math>-inhibitor + methotrexate</b> | 52 (20.7)      | 4 (18.2)   | 11 (39.2)       | 1 (1.2)           | 13 (37.1)  | 12 (70.6)  | 2 (11.8)    | 1 (14.3)   | 8 (19.5)    |
|                        | <b>Adalimumab</b>                                      | 27 (10.8)      | 4 (18.2)   | 4 (14.3)        | 2 (2.4)           | 7 (20.0)   | 4 (23.5)   | 2 (11.8)    |            | 4 (9.8)     |
|                        | <b>Etanercept</b>                                      | 44 (17.5)      | 3 (4.5)    | 11 (39.2)       | 2 (2.4)           | 7 (20.0)   | 9 (52.9)   | 2 (11.8)    | 1 (14.3)   | 9 (22.0)    |
|                        | <b>Infliximab</b>                                      | 14 (5.6)       | 3 (4.5)    |                 |                   | 2 (5.7)    | 4 (23.5)   | 1 (5.9)     | 1 (14.3)   | 3 (7.3)     |
|                        | <b>Anakinra</b>                                        | 2 (0.8)        | 1 (4.5)    |                 |                   |            |            |             | 1 (14.3)   |             |
|                        | <b>Abatacept</b>                                       | 3 (1.2)        | 2 (9.1)    | 1 (3.6)         |                   |            |            |             |            |             |
|                        | <b>Tocilizumab</b>                                     | 7 (2.8)        | 2 (9.1)    | 2 (7.1)         |                   | 1 (2.9)    |            |             | 1 (14.3)   | 1 (2.4)     |
